# Supplementary material
Source: publisher figshare collection journal article supplement (https://karger.figshare.com/ndownloader/files/22295058)
Supplement: Supplementary file 1 [file 22295058]

**ORIGINAL ARTICLE**

**Nonsurgical Treatments for Extramammary Paget Disease. A Systematic Review and Meta-analysis**

IgorSnast,1,2* Eran Sharon,2,3* Ran Kaftory,2 Yehonatan Noyman,1,2 Meital Oren-Shabtai, 1,2 Moshe Lapidoth,1,2 Emmilia Hodak,1,2 Daniel Mimouni,1,2 Sigal Mazor,4 Assi Levi 1,2

1Department of Dermatology, Rabin Medical Center–Beilinson Hospital, Petach Tikva;

2Sackler Faculty of Medicine, Tel Aviv University, Tel Aviv.

3Department of Surgery, Breast Surgery Clinic, Rabin Medical Center, Petah Tikva, Israel. 4Department of Community Dentistry, School of Dental Medicine, Hebrew University-Hadassah. Medical Center, Jerusalem, Israel.

Correspondence to: I. Snast, MD, Department of Dermatology, Rabin Medical Center–Beilinson Hospital, 39 Jabotinsky St., Petach Tikva 4941492, Israel.

Tel: +972-3-937-6653; E mail: snastigor@gmail.com

**Supplementary material**

List of supplementary materials:

1. **PRISMA checklist**
2. **Table S1**. Treatment of EMPD with Imiquimod
3. **Table S2**. Treatment of EMPD with photodynamic therapy
4. **Table S3**. Treatment of EMPD with radiotherapy
5. **Table S4**. Other treatments for EMPD

| **Section/topic** | **#** | **Checklist item** | **Reported on page #** |
| --- | --- | --- | --- |
| **TITLE** | | |  |
| Title | 1 | **Nonsurgical Treatments for Extramammary Paget Disease. A Systematic Review and Meta-analysis** | 1 |
| **ABSTRACT** | | |  |
| Structured summary | 2 | Provide a structured summary including, as applicable: background; objectives; data sources; study eligibility criteria, participants, and interventions; study appraisal and synthesis methods; results; limitations; conclusions and implications of key findings; systematic review registration number. | 2-3 |
| **INTRODUCTION** | | |  |
| Rationale | 3 | Describe the rationale for the review in the context of what is already known. | 4 |
| Objectives | 4 | Provide an explicit statement of questions being addressed with reference to participants, interventions, comparisons, outcomes, and study design (PICOS). | 4 |
| **METHODS** | | |  |
| Protocol and registration | 5 | Indicate if a review protocol exists, if and where it can be accessed (e.g., Web address), and, if available, provide registration information including registration number. | 4 |
| Eligibility criteria | 6 | Specify study characteristics (e.g., PICOS, length of follow-up) and report characteristics (e.g., years considered, language, publication status) used as criteria for eligibility, giving rationale. | 5 |
| Information sources | 7 | Describe all information sources (e.g., databases with dates of coverage, contact with study authors to identify additional studies) in the search and date last searched. | 4 |
| Search | 8 | Present full electronic search strategy for at least one database, including any limits used, such that it could be repeated. | 4 |
| Study selection | 9 | State the process for selecting studies (i.e., screening, eligibility, included in systematic review, and, if applicable, included in the meta-analysis). | 5 |
| Data collection process | 10 | Describe method of data extraction from reports (e.g., piloted forms, independently, in duplicate) and any processes for obtaining and confirming data from investigators. | 5 |
| Data items | 11 | List and define all variables for which data were sought (e.g., PICOS, funding sources) and any assumptions and simplifications made. | 5-6 |
| Risk of bias in individual studies | 12 | Describe methods used for assessing risk of bias of individual studies (including specification of whether this was done at the study or outcome level), and how this information is to be used in any data synthesis. | 6 |
| Summary measures | 13 | State the principal summary measures (e.g., risk ratio, difference in means). | 6 |
| Synthesis of results | 14 | Describe the methods of handling data and combining results of studies, if done, including measures of consistency (e.g., I2) for each meta-analysis. | 6 |

Page 1 of 2

| **Section/topic** | **#** | **Checklist item** | **Reported on page #** |
| --- | --- | --- | --- |
| Risk of bias across studies | 15 | Specify any assessment of risk of bias that may affect the cumulative evidence (e.g., publication bias, selective reporting within studies). | - |
| Additional analyses | 16 | Describe methods of additional analyses (e.g., sensitivity or subgroup analyses, meta-regression), if done, indicating which were pre-specified. | 6 |
| **RESULTS** | | |  |
| Study selection | 17 | Give numbers of studies screened, assessed for eligibility, and included in the review, with reasons for exclusions at each stage, ideally with a flow diagram. | 6-7 |
| Study characteristics | 18 | For each study, present characteristics for which data were extracted (e.g., study size, PICOS, follow-up period) and provide the citations. | 7 |
| Risk of bias within studies | 19 | Present data on risk of bias of each study and, if available, any outcome level assessment (see item 12). | 8, Supplementary material |
| Results of individual studies | 20 | For all outcomes considered (benefits or harms), present, for each study: (a) simple summary data for each intervention group (b) effect estimates and confidence intervals, ideally with a forest plot. | Supplementary material |
| Synthesis of results | 21 | Present results of each meta-analysis done, including confidence intervals and measures of consistency. | 8-11 |
| Risk of bias across studies | 22 | Present results of any assessment of risk of bias across studies (see Item 15). | 8 |
| Additional analysis | 23 | Give results of additional analyses, if done (e.g., sensitivity or subgroup analyses, meta-regression [see Item 16]). | 8-11 |
| **DISCUSSION** | | |  |
| Summary of evidence | 24 | Summarize the main findings including the strength of evidence for each main outcome; consider their relevance to key groups (e.g., healthcare providers, users, and policy makers). | 11-13 |
| Limitations | 25 | Discuss limitations at study and outcome level (e.g., risk of bias), and at review-level (e.g., incomplete retrieval of identified research, reporting bias). | 13 |
| Conclusions | 26 | Provide a general interpretation of the results in the context of other evidence, and implications for future research. | 13-14 |
| **FUNDING** | | |  |
| Funding | 27 | Describe sources of funding for the systematic review and other support (e.g., supply of data); role of funders for the systematic review. | 1 |

*From:*  Moher D, Liberati A, Tetzlaff J, Altman DG, The PRISMA Group (2009). Preferred Reporting Items for Systematic Reviews and Meta-Analyses: The PRISMA Statement. PLoS Med 6(6): e1000097. doi:10.1371/journal.pmed1000097

For more information, visit: **www.prisma-statement.org**.

**Table S1**. Treatment of EMPD with Imiquimod

| **NOS** | **Toxicity (%)** | **Mean follow-up (m)** | **Available post treatment biopsy in most patients** | **CR/>50%/rec (%)** | **Initial treatment (%)** | **Tumor site (%)** | **Female (%)** | **Mean age** | **No. patients** | **Treatment setting** | **Author** |
| --- | --- | --- | --- | --- | --- | --- | --- | --- | --- | --- | --- |
| low | NA | NA | No | 22/71/NA | 100 | Genital (100) | 100 | NA | 18 | 1-5/week for 3-56 weeks | Van der Linden et al., 2018[54] (retrospective) |
| mod | Local irritation (33) | 30 | Yes | 56/100/60 | 56 | Genital (100) | 56 | 79 | 9 | 3/week for 6-16 weeks | Sawada et al., 2017[45] (prospective) |
| low | NA | NA | Yes | 25/NA/0 | 100 | Genital (100) | 100 | NA | 4 | NA | Onaiwu et al., 2017[47] (retrospective) |
| mod | Local irritation (100); Atrophy (17) | 45 | Yes | 33/100/100 | 50 | Genital (83), axilla (17) | 67 | 75 | 6 | 3-7/week for 1-7 months | Liau et al., 2016[51] (retrospective) |
| mod | Local irritation (NA) | 38 | Yes | 75/100/67 | 0 | Genital (87), perianal (13) | 100 | 67 | 8 | 3/week for 12-16 weeks | Cowan et al., 2016[60] (prospective) |
| mod | Local irritation (NA) | 18 | Yes | 90/100/0 | 70 | Genital (100) | 100 | NA | 10 | Every other day for 4-7 months | Marchitelli et al., 2014[53] (prospective) |
| mod | NA | NA | Yes | 52/81/NA | 29 | Genital (100) | 100 | 66 | 21 | 2-3/week for 2-52 weeks | Luyten et al., 2014[52] (retrospective) |
|  | Local irritation (67) | 12 | No | 50/83/33 | 83 | Genital (100) | 100 | 72 | 6 | 3/week for 2-4 months | Sanderson et al., 2013[46] (case series) |
|  | Local irritation (100) | 53 | Yes | 100/100/0 | 100 | Genital (100) | 100 | 69 | 3 | Daily to every other day for 16 weeks | Herranz et al., 2012[50] (case series) |
|  | Local irritation (100) | 15 | Yes | 25/100/100 | 25 | Genital (100) | 100 | 62 | 4 | Twice weekly to every other day for 4-32 weeks | Baiocchi et al., 2011[43] (case series) |
| mod | Local irritation (NA) | 24 | Not clear | 50/NA/NA | 67 | Genital (~92), axilla (~8) | ~14 | ~73 | 12 | 3/week for 2-12 months | Pang et al., 2010[44] (retrospective) |
|  | Local irritation (67) | 23 | Yes | 100/100/0 | 100 | Genital (100) | 100 | 69 | 3 | Daily to every other day for 6 weeks | Sendagorta et al., 2010[49] (case series) |
| low | Local irritation (50); flu symptoms (17) | NA | Yes | 83/100/NA | NA | Genital (100) | 100 | NA | 6 | 2-5/week for 6-48 weeks | Denehy et al., 2008[48] (retrospective) |

CR, complete response; >50%, at least 50% improvement; NOS,Newcastle Ottawa scale.

| **NOS** | **Toxicity (%)** | **Mean follow-up (m)** | **Available post treatment biopsy in most patients** | **CR/>50%/rec (%)** | **Initial treatment (%)** | **Tumor site (%)** | **Female (%)** | **Mean age** | **No. patients** | **Treatment setting** | **Author**  **Table S2**. Treatment of EMPD with photodynamic therapy |
| --- | --- | --- | --- | --- | --- | --- | --- | --- | --- | --- | --- |
| moderate | Local irritation (NA) | 38 | No | 15/53/100 | 8 | Genital (100) | 100 | 70 | 13 | mALA PDT; irradiation with 630-nm red light, 37 J/cm2; 1-3 treatments | Rioli et al., 2018[17] (retrospective) |
| moderate | None | 53 | Yes | 67/100/0 | 67 | Genital (100) | 100 | 53 | 3 | Systemic intravenous hematoporphyrin derivative; irradiation with 630-nm laser 48 hours later, 150 J/cm2 | Choi et al., 2015[23] (retrospective) |
| moderate | Local irritation (100) | 12 | No | 100/100/57 | NA | Genital (100) | 0 | NA | 7 | ALA PDT; irradiation with 635-nm laser, 120 J/cm2; 4-6 treatments 2 weeks apart | Gao et al., 2015[16] (retrospective) |
| moderate | Local irritation (100) | 54 | No | 9/88/100 | 13 | Genital (100) | 100 | 67 | 32 | mALA PDT, every 3 weeks with a median of 12 treatments | Fontanelli et al., 2013[27] (prospective) |
| moderate | Local irritation (NA) | 22 | Not clear | 88/100/100 | NA | Genital (75); Perianal (13); Axillary (13) | 88 | 69 | 8 | mALA PDT; irradiation with 570-670-nm laser, 37 J/cm2; 2 treatments 3 weeks apart | Clement et al., 2011[25] (prospective) |
| moderate | Local irritation (NA) | 32 | No | 25/63/NA | 13 | Genital (38) Perianal (38); Pubis (13); Axillary (13) | 38 | 67 | 8 | ALA PDT or intravenous profimer; irradiation with 633-nm argon pumped dye laser | Housel et al., 2010[21] (retrospective) |
| moderate | Local irritation (100) | 24 | No | 33/NA/50 | 100 | Genital (52); Perianal (24); Axillary (24) | 14 | 68 | 16 | ALA PDT; irradiation with 633-nm red LED lamp, 113 J/cm2; 3 treatments 1 week apart | Li et al., 2010[19] (prospective) |

| **NOS** | **Toxicity (%)** | **Mean follow-up (m)** | **Available post treatment biopsy in most patients** | **CR/>50%/rec (%)** | **Initial treatment (%)** | **Tumor site (%)** | **Female (%)** | **Mean age** | **No. patients** | **Treatment setting** | **Author** |
| --- | --- | --- | --- | --- | --- | --- | --- | --- | --- | --- | --- |
|  | NA | 6 | Yes | 33/100/NA | 100 | Genital (100) | 67 | 72 | 3 | ALA PDT; irradiation with red light laser, 37 J/cm2; 3 treatments 2 weeks apart | Tanaka et al., 2009[20] (case series) |
|  | NA | 12 | No | 0/100/NR | NA | NA | NA | NA | 3 | ALA-PDT; 3-5 treatments 2 weeks apart | Wang et al., 2008[29] (case series) |
|  | Local irritation (NA) | 3 | No | 20/80/NA | 40 | Genital (80); Pubis (20) | 40 | 75 | 5 | Intravenous photofrin; irradiation with diode 630-nm laser 72 hours later, 150-300 J/cm2 | Liu et al., 2007[22] (case series) |
| moderate | Local irritation (100) | 3 | Yes | 57/100/0 | 0 | Genital (100); Axillary (14) | 100 | 63 | 7 | mALA PDT; irradiation with 620-nm red light, 37 J/cm2 every 3 weeks; Overall 3 treatments | Raspagliesi et al., 2006[26] (prospective) |
| moderate | Local irritation (NA) | 26 | No | 0/100/NR | 20 | Genital (80); axilla (20) | 0 | 65 | 5 | ALA PDT; irradiation with 633-nm argon dye laser 200-300 J/cm2 ± red light lamp, 100-200 J/cm2; 1-3 treatments; one patient was also treated with intravenous profimer | Shieh et al., 2002[24] (retrospective) |
| moderate | Local irritation (NA) | 3-36 | Not clear | 50/100/NA | NA | NA | 0 | 62 | 8 | ALA PDT; irradiation with 633-nm HeNe laser; several treatments 2 weeks apart | Xu et al., 2002[18] (retrospective) |
| low | None | NA | Not clear | 50/100/NA | NA | NA | NA | NA | 4 | Systemic intravenous hematoporphyrin; various lasers; several treatments 2 days apart | Wang et al., 1993[28] (retrospective) |

CR, complete response; >50%, at least 50% improvement; NOS,Newcastle Ottawa scale.

| **NOS** | **Toxicity (%)** | **Mean follow-up (m)** | **Available post treatment biopsy in most patients** | **CR/>50%/rec (%)** | **Initial treatment (%)** | **Tumor site (%)** | **Female (%)** | **Mean age** | **No. patients** | **Treatment setting** | **Author** |
| --- | --- | --- | --- | --- | --- | --- | --- | --- | --- | --- | --- |
|  | Erosions (67); mucositis (33) | 66 | No | 100/100/0 | 100 | Genital (100) | 33 | 72 | 3 | Boron neutron capture therapy; 18-23 Gy-Eq; single fraction | Hiratsuka et al., 2018[30] (case series) |
|  | Dermatitis (100) | 84 | No | 86/100/17 | 43 | Genital (29); perianal (29); Inguinal/pubic (43) | 14 | 77 | 7 | X-rays radiotherapy; 2-4 Gy per day; 2-5 days per week until a total dose of 40-56 Gy | Tackenberg et al., 2015[33] (case series) |
| moderate | Skin toxicity and diarrhea (NA) | 94 | No | 100/100/50 | 33 | Genital (67); perianal (33) | 50 | 76 | 6 | X-rays or electron radiotherapy; 50-60 Gy, 20-30 fractions | Itonaga et al., 2014[39] (retrospective) |
|  | Erosions (100) | 35 | Yes | 100/100/60 | 100 | Genital (100) | 80 | 69 | 5 | Brachytherapy with 188RE; 1-2 treatments | Carrozzo et al., 2014[32] (case series) |
| moderate | NA | NA | Not clear | 100/100/25 | 88 | Genital (100) | 100 | 74 | 8 | Electron radiotherapy; 60-63 Gy, 20-29 fractions | Cai et al., 2013[36] (retrospective) |
| moderate | Dermatitis (100); Hematological toxicities (NA); Colitis, cystitis and urethritis (NA) | 58 | No | 100/100/27 | 100 | Genital (55); perineum (45) | 100 | 77 | 11 | X-rays or electron radiotherapy | Hata et al., 2012[31] (retrospective) |
| moderate | NA | 34 | Not clear | 100/100/67 | 100 | Genital (67); perineum (33) | 67 | 86 | 3 | Electron radiotherapy; 60-66 Gy, 30-32 fractions | Ito et al., 2012[37] (retrospective) |
|  | Skin toxicity (100); hypopigmentation (60); atrophy (100) | 88 | No | 80/100/25 | 40 | Genital (80); pubis (20) | 0 | 63 | 5 | Electron or X-ray; 33-66 Gy, 10-28 fractions | Luk et al., 2003[35] (case series) |
|  | NA | 63 | Not clear | 100/100/60 | 20 | Perianal (100) | 80 | 77 | 5 | X-ray radiotherapy; 36-50 Gy, 5-25 fractions | Brown et al., 2002[38] (case series) |
|  | Skin toxicity (100) | 48 | No | 100/100/0 | 100 | Genital (60); pubis (40); axilla (20) | 40 | 75 | 5 | X-ray radiotherapy; 40 Gy rays in nine fractions over *3* weeks | Burrows et al., 1995[42] (case series) |
|  | Skin toxicity (100) | 33 | Not clear | 100/100/0 | 100 | Perianal (100) | 67 | 66 | 3 | Electron or X-ray radiotherapy; 23-64 Gy, 3 fractions | Besa et al., 1992[34] (case series) |
|  | Skin toxicity (100) | 30 | Not clear | 100/100/33 | 100 | Genital (67); perianal (33) | 67 | 78 | 6 | Electron or X-ray radiotherapy; 30-54 Gy, 12-57 fractions | Brierley et al., 1991[40] (case series) |

**Table S3**. Treatment of EMPD with radiotherapy

CR, complete response; >50%, at least 50% improvement; NOS,Newcastle Ottawa scale.

**Table S4**. Other treatments for EMPD

| **NOS** | **Toxicity (%)** | **Mean follow-up (m)** | **Available post treatment biopsy in most patients** | **CR/>50%/rec (%)** | **Initial treatment (%)** | **Tumor site (%)** | **Female (%)** | **Mean age** | **No. patients** | **Treatment setting** | **Author** |
| --- | --- | --- | --- | --- | --- | --- | --- | --- | --- | --- | --- |
| **Laser** | | | | | | | | | | | |
| moderate | Bleeding, scarring and long healing (NA) | 5-60 | Yes | 100/100/~33 | NA | Genital (90); perianal (10) | 27 | 75 | 30 | Holmium laser 1.0–2.0 J 20 Hz with a 2-mm spot size | Ziyao et al., 2014[55]  (retrospective) |
| moderate | NA | 24 | No | 100/100/67 | 100 | Genital (100) | 100 | NA | 6 | CO2 laser 10-12 W, 2 mm spot size | Louis-sylvestre et al., 2001[57] (retrospective) |
|  | NA | NA | No | 100/100/100 | 100 | Genital (100) | 0 | 71 | 3 | CO2 laser 10-60 W | Choi et al., 2001[56] (case series) |
| **Fluorouracil cream & calcipotriene cream** | | | | | | | | | | | |
|  | Well tolerated | NA | Yes | 0/variable improvement/NR | 0 | Genital (33); perianal (33), facial (33) | 100 | NA | 3 | 5% fluorouracil cream and 0.005% calcipotriene cream for refractory EMPD; twice daily, 1-8 days per month | Molina et al., 2019[58] (case series) |

CR, complete response; >50%, at least 50% improvement; NOS,Newcastle Ottawa scale.
